# Supplementary material for: The dipeptidyl peptidase-4 inhibitory effect of flavonoids is hindered in protein rich environments
Source: Royal Society of Chemistry journal article supplement (doi:10.1039/c9fo00722a), 2019-01-01
Supplement: c9fo00722a1.pdf [file c9fo00722a1.pdf]

SUPPLEMENTARY MATERIAL

Flavonoid C11

Nonlinear regression using SOLVER

|          |        |       |          |                                 |       |        |        |        |        |                               |        |      |
|----------|--------|-------|----------|---------------------------------|-------|--------|--------|--------|--------|-------------------------------|--------|------|
| x values | 0,0625 | 9,21  | y values | concentrations of the inhibitor | 7,985 | 10,219 | 7,789  | 10,837 | 8,857  | 9,594                         | 1,22   |      |
|          | 0,125  | 11,50 |          |                                 | 0     | 11,256 | 11,228 | 10,891 | 11,576 | 12,305                        | 11,743 | 0,49 |
|          | 0,25   | 15,52 |          |                                 | 0     | 14,618 | 14,912 | 15,03  | 15,908 | 16,872                        | 15,809 | 0,83 |
|          | 0,0625 | 6,75  |          |                                 | 37,5  | 5,924  | 7,179  | 5,714  | 7,466  | 6,915                         | 7,318  | 0,75 |
|          | 0,125  | 8,29  |          |                                 | 37,5  | 8,135  | 8,455  | 7,999  | 7,999  | 8,842                         | 8,338  | 0,32 |
|          | 0,25   | 11,45 |          |                                 | 37,5  | 10,817 | 11,491 | 10,873 | 11,278 | 13,305                        | 10,956 | 0,94 |
|          | 0,0625 | 6,29  |          |                                 | 50    | 5,416  | 6,774  | 5,472  | 6,932  | 6,623                         | 6,496  | 0,67 |
|          | 0,125  | 7,61  |          |                                 | 50    | 7,503  | 7,179  | 7,391  | 7,593  | 8,352                         | 7,658  | 0,40 |
|          | 0,25   | 10,49 |          |                                 | 50    | 10,359 | 9,929  | 10,698 | 9,701  | 11,966                        | 10,268 | 0,80 |
|          | 0,0625 | 5,20  |          |                                 | 75    | 4,083  | 5,549  | 4,532  | 5,985  | 5,469                         | 5,556  | 0,73 |
|          | 0,125  | 5,92  |          |                                 | 75    | 5,333  | 5,721  | 5,624  | 5,573  | 7,325                         | 5,958  | 0,72 |
|          | 0,25   | 7,93  |          |                                 | 75    | 7,094  | 6,018  | 8,255  | 8,433  | 9,632                         | 8,169  | 1,24 |
|          | 0,0625 | 4,12  |          |                                 | 100   | 3,29   | 3,946  | 3,658  | 4,384  | 4,895                         | 4,541  | 0,60 |
|          | 0,125  | 4,90  |          |                                 | 100   | 4,288  | 4,729  | 4,474  | 4,638  | 6,287                         | 4,999  | 0,72 |
|          | 0,25   | 6,01  |          |                                 | 100   | 5,512  | 5,313  | 5,328  | 6,529  | 7,146                         | 6,261  | 0,75 |
|          | 0,0625 | 2,88  |          |                                 | 150   | 2,206  | 3,011  | 2,498  | 3,57   | 2,692                         | 3,281  | 0,51 |
|          | 0,125  | 3,29  |          |                                 | 150   | 2,613  | 2,789  | 3,166  | 3,46   | 4,197                         | 3,488  | 0,57 |
|          | 0,25   | 4,08  |          |                                 | 150   | 3,309  | 3,54   | 4,17   | 4,842  | 4,399                         | 4,241  | 0,57 |
|          |        |       |          |                                 |       |        |        |        |        | standard deviations $y_{exp}$ |        |      |

**Figure 1S:** Mean values of the slopes (y values) and respective standard deviations as results of the *in vitro* inhibition of DPP-4 (38 U/mL) by flavonoid **C11** (0 - 150  $\mu$ M) using three concentrations of the substrate (x values: 0.0625; 0.125 and 0.25 mM).

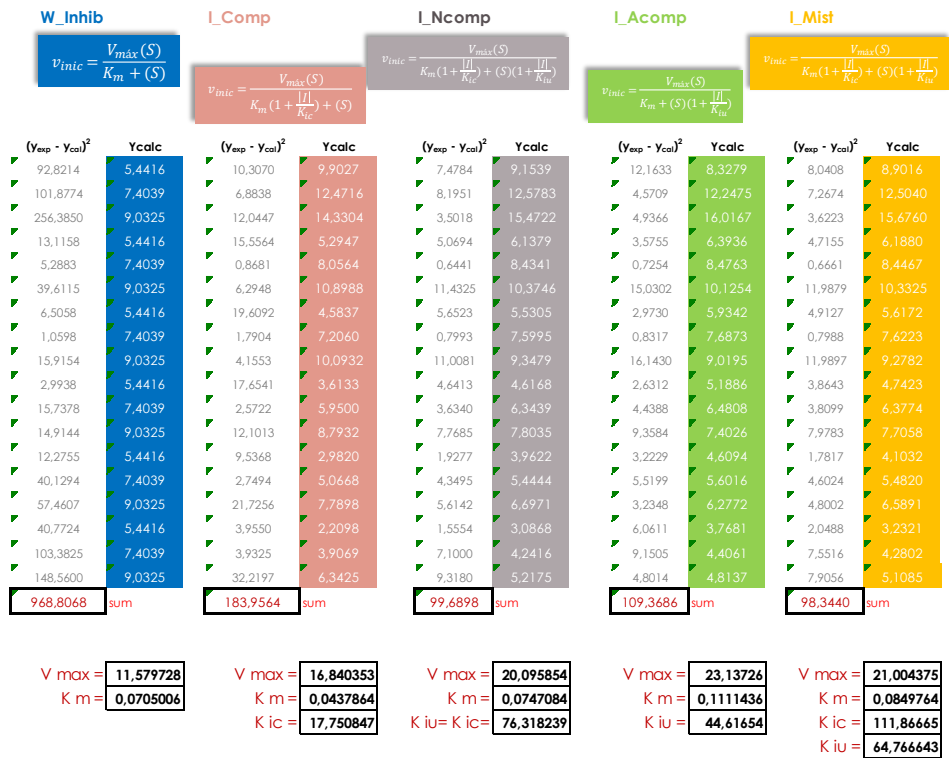

**Figure 2S:** Sum of the squares (sum) of the different models (without inhibition, competitive inhibition, noncompetitive inhibition, uncompetitive inhibition and mixed inhibition) from the results obtained from DPP-4 inhibition by flavonoid **C11**.

Comparison based on F test:

|                                  | (Y <sub>exp</sub> - Y <sub>calc</sub> ) <sup>2</sup> | p        | N          | N-pB       | f <sub>0,05</sub> | F <sub>calc</sub> | ΔSS          | Δ df         | Δ SS/Δ df | p (%) |
|----------------------------------|------------------------------------------------------|----------|------------|------------|-------------------|-------------------|--------------|--------------|-----------|-------|
| <b>Without inhibition</b>        | 968,8068                                             | <b>2</b> | <b>108</b> | <b>106</b> |                   |                   |              |              |           |       |
| <b>Competitive inhibition</b>    | 183,9564                                             | <b>3</b> | <b>108</b> | <b>105</b> | 1,380             | <b>447,98</b>     | <b>0,871</b> | <b>0,010</b> | 90,536    | 0%    |
| <b>Noncompetitive inhibition</b> | 99,6898                                              | <b>3</b> | <b>108</b> | <b>105</b> | 1,381             | <b>915,41</b>     | <b>0,014</b> | <b>0,010</b> | 1,423     | 24%   |
| <b>Uncompetitive inhibition</b>  | 109,3686                                             | <b>3</b> | <b>108</b> | <b>105</b> | 1,381             | <b>825,11</b>     | <b>0,112</b> | <b>0,010</b> | 11,659    | 0%    |
| <b>Mixed inhibition</b>          | 98,3440                                              | <b>4</b> | <b>108</b> | <b>104</b> | 1,382             | <b>460,26</b>     |              |              |           |       |

Comparison based on Akaike test:

|                                  | AIC c    | ΔAICc   |        |      |       |
|----------------------------------|----------|---------|--------|------|-------|
| <b>Without inhibition</b>        | 243,1713 | ↓       |        |      |       |
| <b>Competitive inhibition</b>    | 65,8982  | -177,27 | ↓      |      |       |
| <b>Noncompetitive inhibition</b> | -0,2664  | -243,44 |        | ↓    |       |
| <b>Uncompetitive inhibition</b>  | 9,7409   | -233,43 |        |      | ↓     |
| <b>Mixed inhibition</b>          | 0,4617   | -242,71 | -65,44 | 0,73 | -9,28 |

**Figure 3S:** Comparison of the different models (without inhibition, competitive inhibition, noncompetitive inhibition, uncompetitive inhibition and mixed inhibition) applying the F test and the Akaike test, obtained from DPP-4 inhibition by flavonoid **C11**.

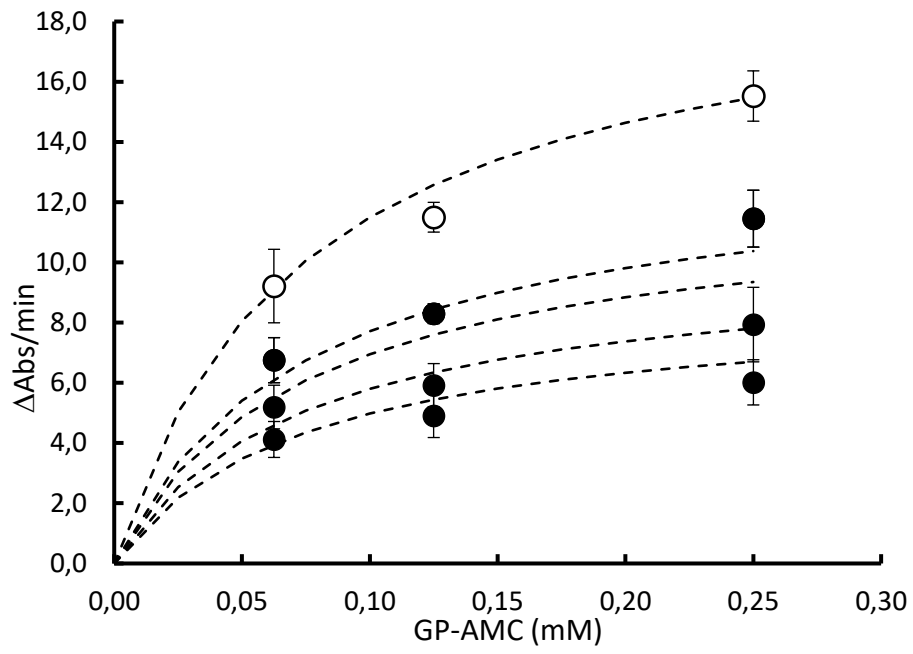

**Figure 4S:** Michaelis-Menten representation of the noncompetitive inhibition model of flavonoid **C11**.

# Sitagliptin

## Nonlinear regression using SOLVER

|          |        |       |          |        |                                |        |        |        |                              |        |      |
|----------|--------|-------|----------|--------|--------------------------------|--------|--------|--------|------------------------------|--------|------|
| x values | 0,0625 | 8,88  | y values | 0      | concentration of the inhibitor | 8,019  | 9,369  | 7,259  | 8,892                        | 10,846 | 1,37 |
|          | 0,125  | 11,64 |          | 0      |                                | 11,649 | 11,753 | 10,586 | 11,229                       | 12,986 | 0,88 |
|          | 0,25   | 15,17 |          | 0      |                                | 14,638 | 15,24  | 13,771 | 14,854                       | 17,326 | 1,32 |
|          | 0,0625 | 6,99  |          | 0,0125 |                                | 6,501  | 8,199  | 5,306  | 7,18                         | 7,776  | 1,14 |
|          | 0,125  | 9,44  |          | 0,0125 |                                | 9,674  | 10,21  | 8,259  | 8,886                        | 10,151 | 0,85 |
|          | 0,25   | 13,93 |          | 0,0125 |                                | 13,34  | 14,66  | 12,36  | 13,4                         | 15,918 | 1,38 |
|          | 0,0625 | 5,92  |          | 0,025  |                                | 5,234  | 7,066  | 4,704  | 6,186                        | 6,413  | 0,95 |
|          | 0,125  | 8,18  |          | 0,025  |                                | 8,057  | 9,341  | 7,297  | 7,712                        | 8,516  | 0,79 |
|          | 0,25   | 11,87 |          | 0,025  |                                | 11,732 | 12,91  | 11,009 | 11,65                        | 12,062 | 0,69 |
|          | 0,0625 | 4,41  |          | 0,05   |                                | 4,088  | 5,184  | 3,363  | 4,583                        | 4,811  | 0,71 |
|          | 0,125  | 6,51  |          | 0,05   |                                | 6,455  | 7,249  | 5,911  | 6,536                        | 6,423  | 0,48 |
|          | 0,25   | 9,59  |          | 0,05   |                                | 9,988  | 10,564 | 8,62   | 9,268                        | 9,49   | 0,74 |
|          | 0,0625 | 3,01  |          | 0,1    |                                | 2,715  | 3,654  | 2,418  | 3,002                        | 3,242  | 0,48 |
|          | 0,125  | 4,51  |          | 0,1    |                                | 4,596  | 5,145  | 4,114  | 4,532                        | 4,143  | 0,42 |
|          | 0,25   | 7,48  |          | 0,1    |                                | 7,277  | 8,023  | 6,823  | 7,366                        | 7,935  | 0,50 |
|          | 0,0625 | 1,90  |          | 0,2    |                                | 1,642  | 2,327  | 1,553  | 2,02                         | 1,938  | 0,31 |
| 0,125    | 2,89   | 0,2   | 2,956    | 3,296  | 2,716                          | 2,858  | 2,606  | 0,27   |                              |        |      |
| 0,25     | 5,02   | 0,2   | 4,89     | 5,512  | 4,945                          | 4,958  | 4,803  | 0,28   |                              |        |      |
|          |        |       |          |        |                                |        |        |        | standard deviation $y_{exp}$ |        |      |

**Figure 55:** Mean values of the slopes (y values) and respective standard deviations as results of the *in vitro* inhibition of DPP-4 (38 U/mL) by **sitagliptin** (0 - 0.2  $\mu$ M) using three concentrations of the substrate (x values: 0.0625; 0.125 and 0.25 mM).

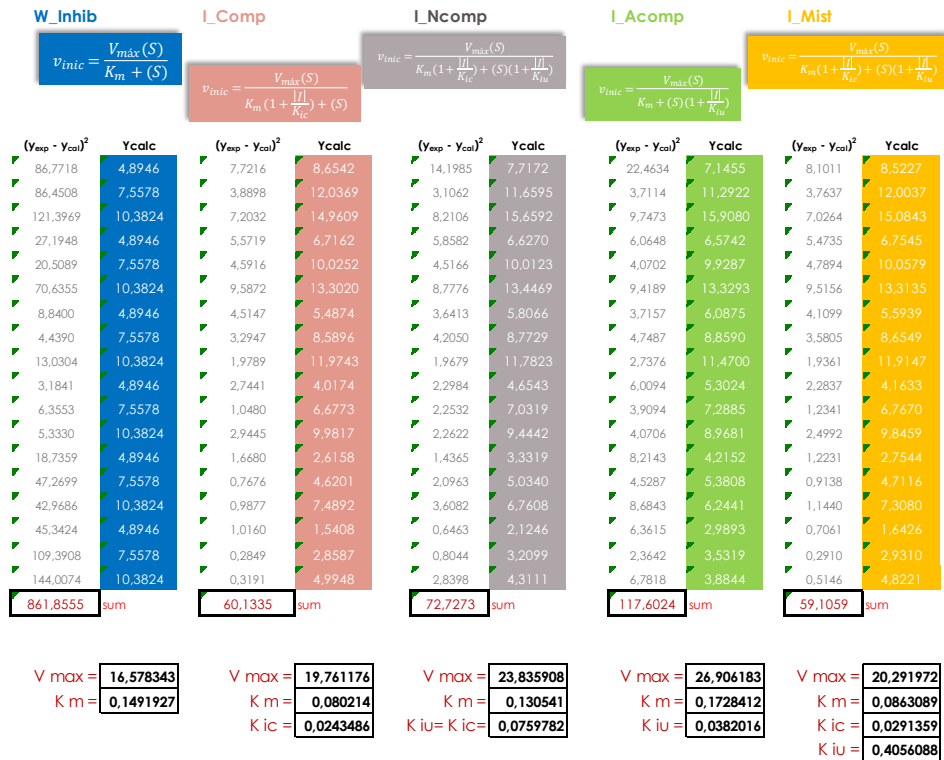

**Figure 6S:** Sum of the squares (sum) of the different models (without inhibition, competitive inhibition, noncompetitive inhibition, uncompetitive inhibition and mixed inhibition) from the results obtained from DPP-4 inhibition by sitagliptin.

Comparison based on F test:

|                                  | (Y <sub>exp</sub> - Y <sub>calc</sub> ) <sup>2</sup> | p        | N         | N-pB      | f <sub>0,05</sub> | F <sub>calc</sub> | Δ SS         | Δ df         | Δ SS/Δ df | p (%) |
|----------------------------------|------------------------------------------------------|----------|-----------|-----------|-------------------|-------------------|--------------|--------------|-----------|-------|
| <b>Without inhibition</b>        | 861,8555                                             | <b>2</b> | <b>90</b> | <b>88</b> |                   |                   |              |              |           |       |
| <b>Competitive inhibition</b>    | <b>60,1335</b>                                       | <b>3</b> | <b>90</b> | <b>87</b> | 1,424             | <b>1159,92</b>    | <b>0,017</b> | <b>0,012</b> | 1,495     | 22%   |
| <b>Noncompetitive inhibition</b> | <b>72,7273</b>                                       | <b>3</b> | <b>90</b> | <b>87</b> | 1,426             | <b>943,99</b>     | <b>0,230</b> | <b>0,012</b> | 19,819    | 0%    |
| <b>Uncompetitive inhibition</b>  | <b>117,6024</b>                                      | <b>3</b> | <b>90</b> | <b>87</b> | 1,426             | <b>550,58</b>     | <b>0,990</b> | <b>0,012</b> | 85,113    | 0%    |
| <b>Mixed inhibition</b>          | 59,1059                                              | <b>4</b> | <b>90</b> | <b>86</b> | 1,427             | <b>584,01</b>     |              |              |           |       |

Comparison based on Akaike test:

|                                  | AIC c           | ΔAICc          |      |        |               |
|----------------------------------|-----------------|----------------|------|--------|---------------|
| <b>Without inhibition</b>        | 209,6077        |                |      |        |               |
| <b>Competitive inhibition</b>    | <b>-27,8321</b> | <b>-237,44</b> | ↓    |        |               |
| <b>Noncompetitive inhibition</b> | -10,7186        | -220,33        | ↓    | ↓      |               |
| <b>Uncompetitive inhibition</b>  | 32,5347         | -177,07        |      |        | ↓             |
| <b>Mixed inhibition</b>          | -27,1455        | -236,75        | 0,69 | -16,43 | <b>-59,68</b> |

**Figure 7S:** Comparison of the different models (without inhibition, competitive inhibition, noncompetitive inhibition, uncompetitive inhibition and mixed inhibition) applying the F test and the Akaike test, obtained from DPP-4 inhibition by sitagliptin.

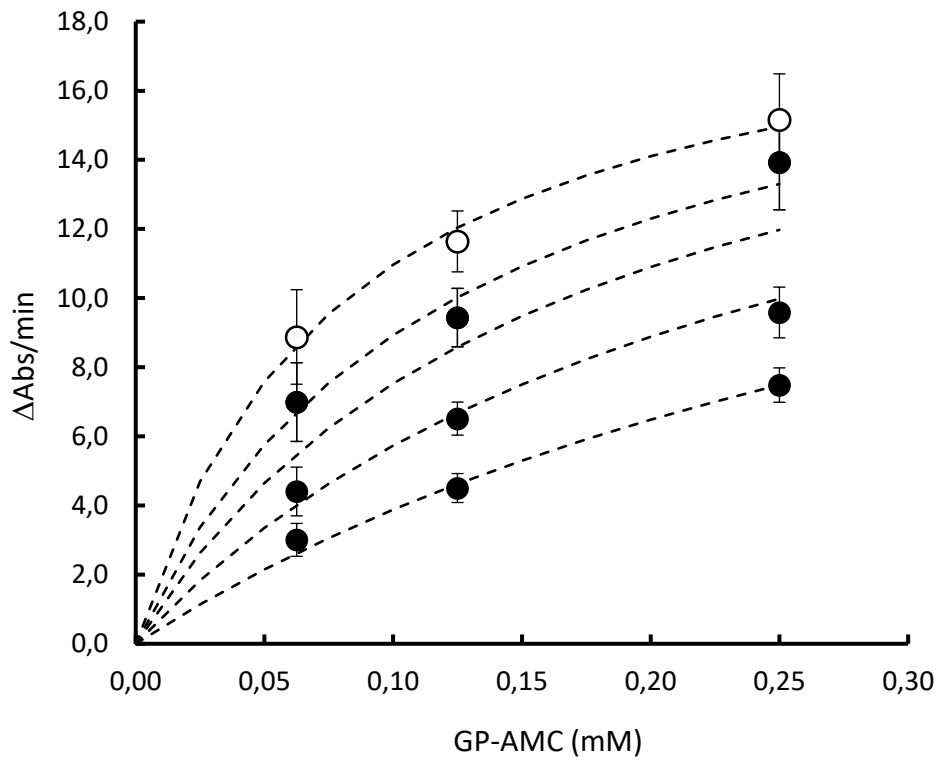

**Figure 85:** Michaelis-Menten representation of the competitive inhibition model of sitagliptin.

## Diprotin A

### Nonlinear regression using SOLVER

|          |        |       |          |       |                                |        |        |        |        |        |      |                              |
|----------|--------|-------|----------|-------|--------------------------------|--------|--------|--------|--------|--------|------|------------------------------|
| x values | 0,0625 | 9,15  | y values | 0     | concentration of the inhibitor | 10,089 | 8,902  | 10,261 | 8,131  | 8,359  | 0,98 | standard deviation $y_{exp}$ |
|          | 0,125  | 12,28 |          | 0     |                                | 11,9   | 13,302 | 12,323 | 11,988 | 11,9   | 0,60 |                              |
|          | 0,25   | 16,43 |          | 0     |                                | 15,856 | 16,972 | 16,52  | 16,347 | 16,442 | 0,40 |                              |
|          | 0,0625 | 7,24  |          | 7,8   |                                | 7,752  | 6,913  | 8,004  | 6,795  | 6,718  | 0,60 |                              |
|          | 0,125  | 9,99  |          | 7,8   |                                | 9,823  | 9,38   | 10,21  | 10,17  | 10,348 | 0,39 |                              |
|          | 0,25   | 14,67 |          | 7,8   |                                | 14,14  | 14,69  | 14,75  | 14,97  | 14,773 | 0,31 |                              |
|          | 0,0625 | 6,09  |          | 15,6  |                                | 6,887  | 5,655  | 7,089  | 5,433  | 5,381  | 0,83 |                              |
|          | 0,125  | 8,55  |          | 15,6  |                                | 8,439  | 8,692  | 8,75   | 8,764  | 8,096  | 0,28 |                              |
|          | 0,25   | 12,54 |          | 15,6  |                                | 12,265 | 12,624 | 12,432 | 13,339 | 12,063 | 0,49 |                              |
|          | 0,0625 | 4,46  |          | 31,3  |                                | 5,055  | 4,104  | 5,079  | 4,088  | 3,996  | 0,55 |                              |
|          | 0,125  | 6,57  |          | 31,3  |                                | 6,646  | 6,566  | 6,492  | 6,898  | 6,27   | 0,23 |                              |
|          | 0,25   | 10,29 |          | 31,3  |                                | 10,148 | 10,196 | 10,257 | 11,164 | 9,69   | 0,54 |                              |
|          | 0,0625 | 2,93  |          | 62,5  |                                | 3,37   | 2,701  | 3,309  | 2,83   | 2,438  | 0,40 |                              |
|          | 0,125  | 4,61  |          | 62,5  |                                | 4,661  | 4,486  | 4,541  | 5,134  | 4,224  | 0,33 |                              |
|          | 0,25   | 7,51  |          | 62,5  |                                | 7,575  | 7,38   | 7,366  | 8,224  | 6,989  | 0,45 |                              |
|          | 0,0625 | 1,73  |          | 125   |                                | 1,921  | 1,593  | 1,87   | 1,706  | 1,54   | 0,17 |                              |
| 0,125    | 2,86   | 125   | 2,733    | 2,809 | 2,84                           | 3,234  | 2,673  | 0,22   |        |        |      |                              |
| 0,25     | 4,78   | 125   | 4,756    | 4,784 | 4,651                          | 5,283  | 4,436  | 0,31   |        |        |      |                              |

**Figure 9S:** Mean values of the slopes (y values) and respective standard deviations as results of the *in vitro* inhibition of DPP-4 (38 U/mL) by **diprotin A** (0 - 125  $\mu$ M) using three concentrations of the substrate (x values: 0.0625; 0.125 and 0.25 mM).

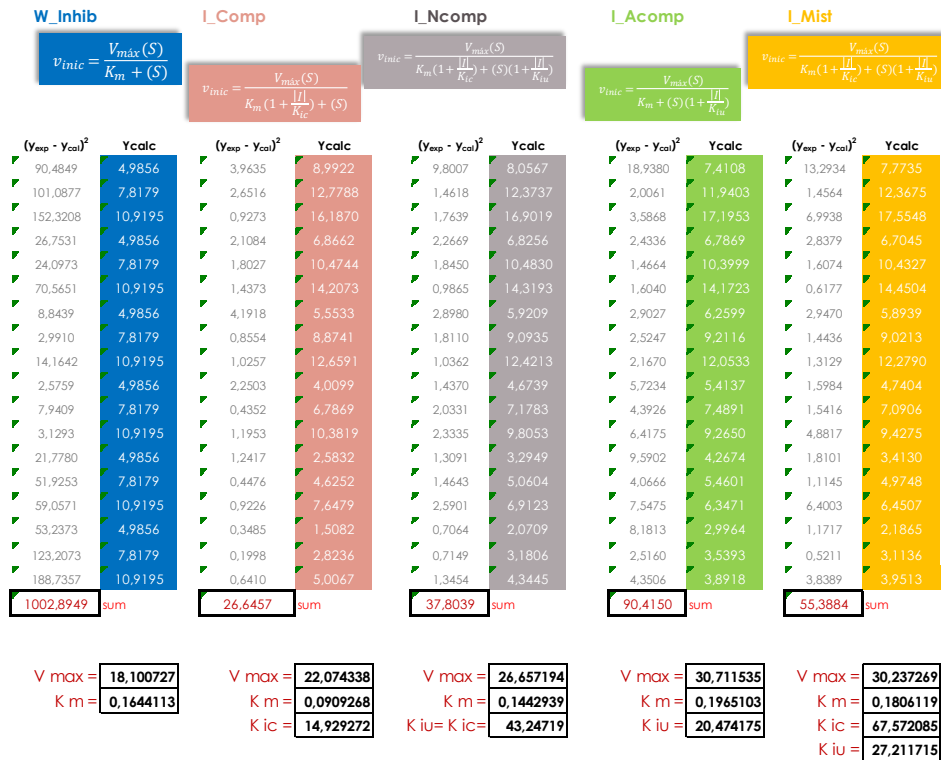

**Figure 10S:** Sum of the squares (sum) of the different models (without inhibition, competitive inhibition, noncompetitive inhibition, uncompetitive inhibition and mixed inhibition) from the results obtained from DPP-4 inhibition by **diprotin A**.

Comparison based on F test:

|                                  | (Y <sub>exp</sub> - Y <sub>calc</sub> ) <sup>2</sup> | p        | N         | N-pB      | f <sub>0,05</sub> | F <sub>calc</sub> | Δ SS          | Δ df         | Δ SS/Δ df | p (%) |
|----------------------------------|------------------------------------------------------|----------|-----------|-----------|-------------------|-------------------|---------------|--------------|-----------|-------|
| <b>Without inhibition</b>        | 1002,8949                                            | <b>2</b> | <b>90</b> | <b>88</b> |                   |                   |               |              |           |       |
| <b>Competitive inhibition</b>    | 26,6457                                              | <b>3</b> | <b>90</b> | <b>87</b> | 1,424             | <b>3187,52</b>    | <b>-0,519</b> | <b>0,012</b> | -44,628   | 25%   |
| <b>Noncompetitive inhibition</b> | 37,8039                                              | <b>3</b> | <b>90</b> | <b>87</b> | 1,426             | <b>2221,01</b>    | <b>-0,317</b> | <b>0,012</b> | -27,303   | 0%    |
| <b>Uncompetitive inhibition</b>  | 90,4150                                              | <b>3</b> | <b>90</b> | <b>87</b> | 1,426             | <b>878,02</b>     | <b>0,632</b>  | <b>0,012</b> | 54,385    | 0%    |
| <b>Mixed inhibition</b>          | 55,3884                                              | <b>4</b> | <b>90</b> | <b>86</b> | 1,427             | <b>735,58</b>     |               |              |           |       |

Comparison based on Akaike test:

|                                  | AIC c     | ΔAICc   |       |       |        |
|----------------------------------|-----------|---------|-------|-------|--------|
| <b>Without inhibition</b>        | 223,2480  |         |       |       |        |
| <b>Competitive inhibition</b>    | -101,0866 | -324,33 | ↓     |       |        |
| <b>Noncompetitive inhibition</b> | -69,6061  | -292,85 | ↓     | ↓     |        |
| <b>Uncompetitive inhibition</b>  | 8,8738    | -214,37 | ↓     | ↓     | ↓      |
| <b>Mixed inhibition</b>          | -32,9919  | -256,24 | 68,09 | 36,61 | -41,87 |

**Figure 11S:** Comparison of the different models (without inhibition, competitive inhibition, noncompetitive inhibition, uncompetitive inhibition and mixed inhibition) applying the F test and the Akaike test, obtained from DPP-4 inhibition by **diprotin A**.



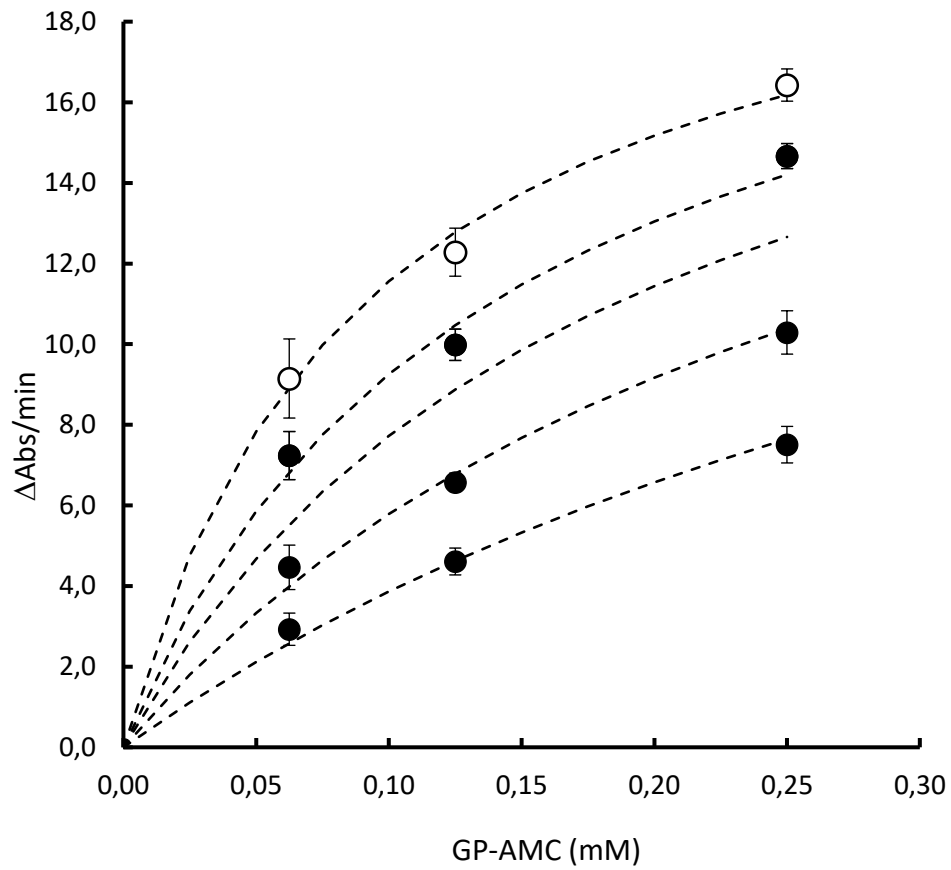

**Figure 12S:** Michaelis-Menten representation of the competitive inhibition model of **diprotin A**.
